# Supplementary material for: Compliments of confinements: substitution and dimension induced magnetic origin and band-bending mediated photocatalytic enhancements in Bi 1−x Dy x FeO 3 particulate and fiber nanostructures
Source: Royal Society of Chemistry journal article supplement (doi:10.1039/c5nr01079a), 2015-01-01
Supplement: c5nr01079a1.pdf [file c5nr01079a1.pdf]

## Electronic Supplementary Information

# Compliments of Confinements: Substitution and Dimension Induced Magnetic Origin and Band-Bending Mediated Photocatalytic Enhancements in $\text{Bi}_{1-x}\text{Dy}_x\text{FeO}_3$ Particulate and Fiber Nanostructures

*M. Sakar,<sup>a</sup> S. Balakumar,<sup>a,\*</sup> P. Saravanan<sup>b</sup> and S. Bharathkumar<sup>a</sup>*

<sup>a</sup> National Centre for Nanoscience and Nanotechnology, University of Madras, Guindy Campus, Chennai 600 0025, India.

<sup>b</sup> Defence Metallurgical Research Laboratory, Hyderabad 500 058, India.

\*Email: [balasuga@yahoo.com](mailto:balasuga@yahoo.com)

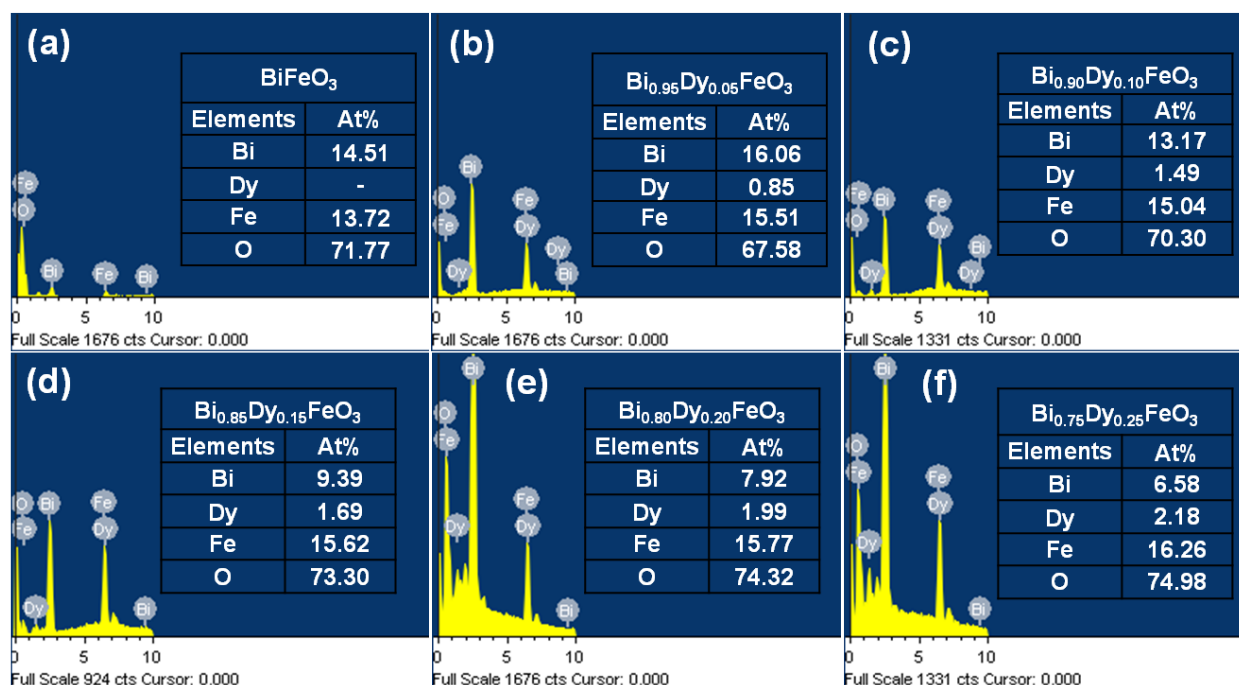

**Fig. S1(a)-(f)** Energy dispersive X-ray spectra and estimated atomic percentage of the elements in  $\text{Bi}_{1-x}\text{Dy}_x\text{FeO}_3$  particulate compositions

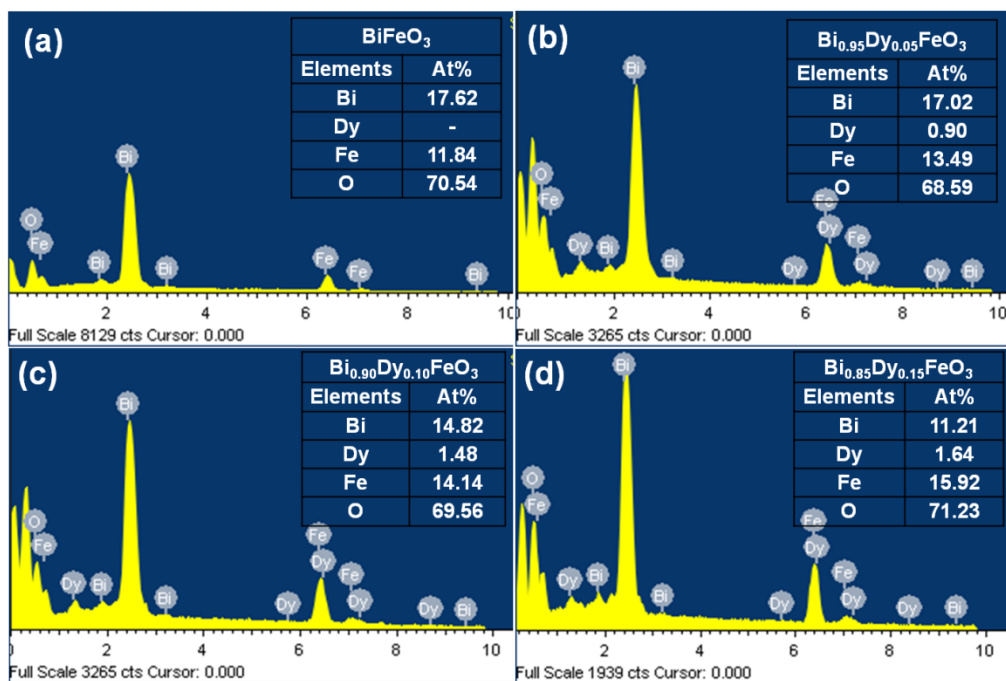

**Fig. S2(a)-(d)** Energy dispersive X-ray spectra and estimated atomic percentage of the elements in  $\text{Bi}_{1-x}\text{Dy}_x\text{FeO}_3$  fiber compositions

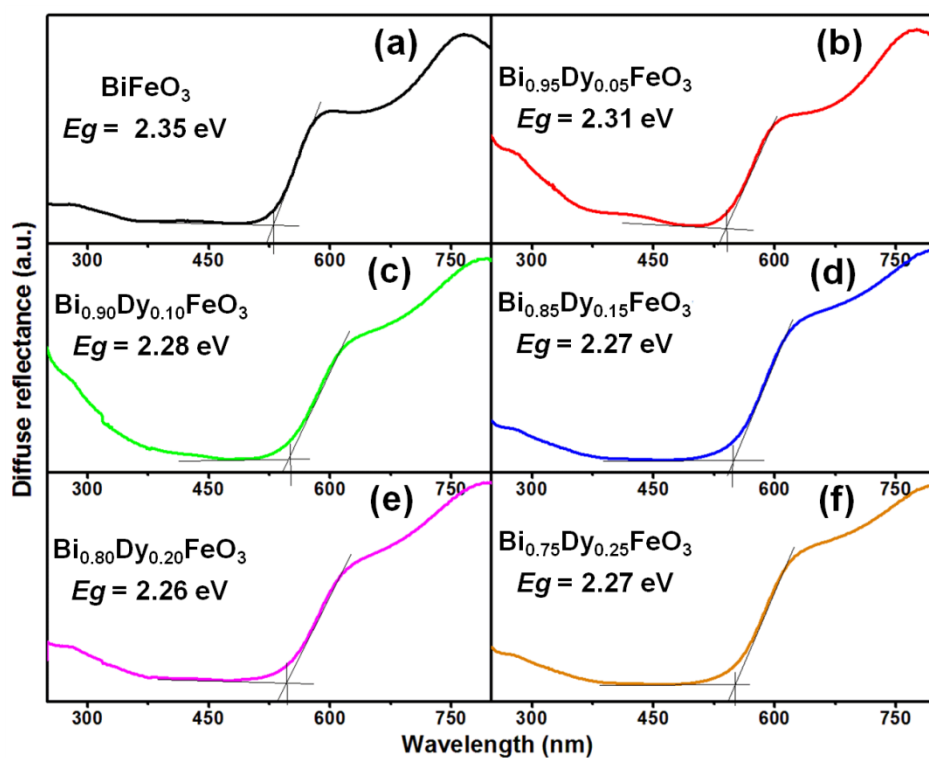

**Fig. S3(a)-(f)** UV-Vis diffuse reflectance spectra and the estimated band gap energy of  $\text{Bi}_{1-x}\text{Dy}_x\text{FeO}_3$  particulate compositions

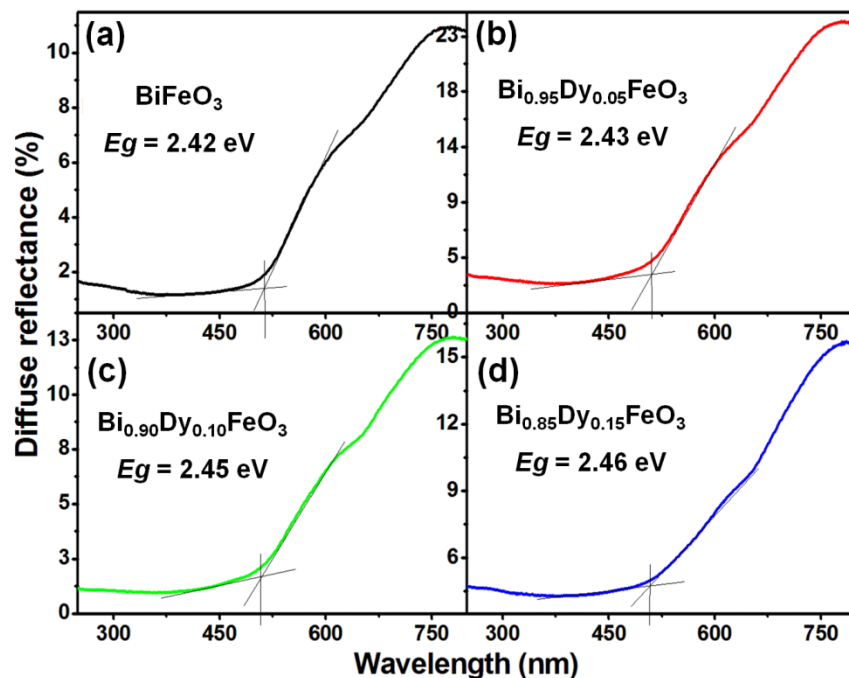

**Fig. S4(a)-(d)** UV-Vis diffuse reflectance spectra and the estimated band gap energy of  $\text{Bi}_{1-x}\text{Dy}_x\text{FeO}_3$  fiber compositions

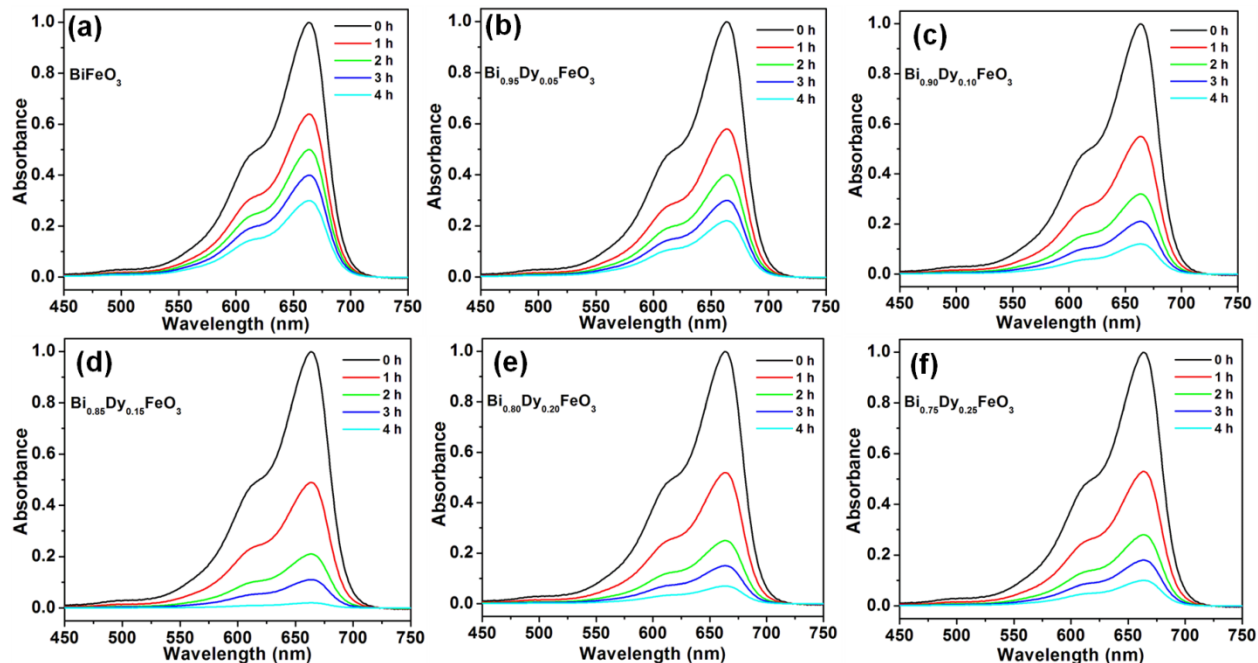

**Fig. S5** Photocatalytic degradation spectra of methylene blue by  $\text{Bi}_{1-x}\text{Dy}_x\text{FeO}_3$  particulates, where  $x =$  (a) 0.0, (b) 0.05, (c) 0.10, (d) 0.15, (e) 0.20, and (f) 0.25.

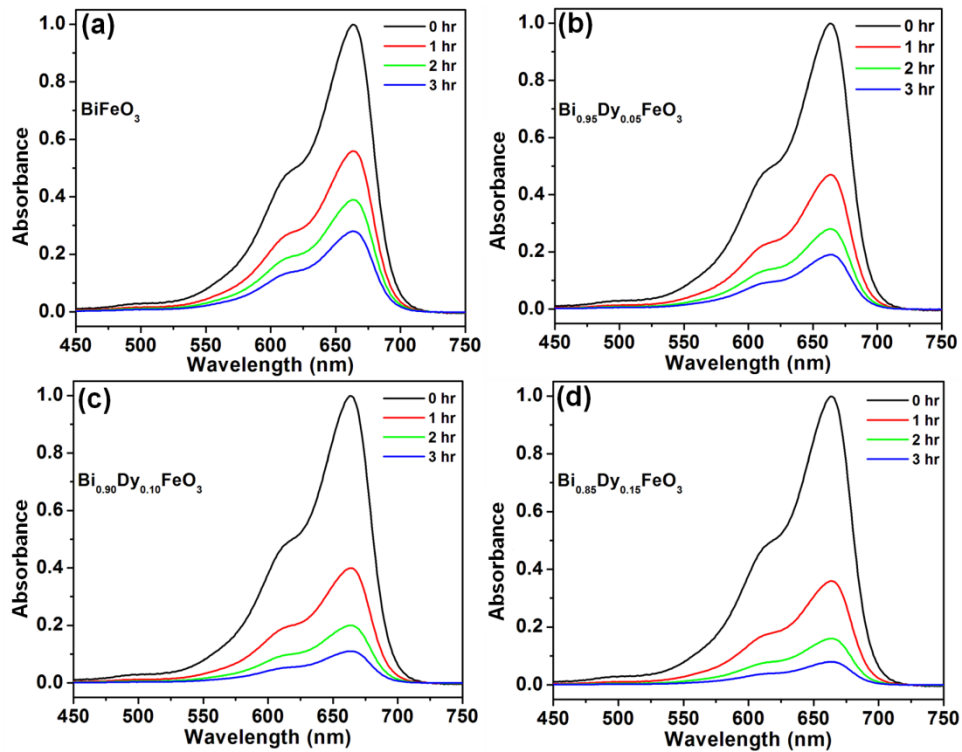

**Fig. S6** Photocatalytic degradation spectra of methylene blue by  $\text{Bi}_{1-x}\text{Dy}_x\text{FeO}_3$  fibers where,  $x =$   
**(a)** 0.0, **(b)** 0.05, **(c)** 0.10, and **(d)** 0.15
